# Supplementary material for: Enhanced LC-ESI-MS/MS Sensitivity by Cationic Derivatization of Organophosphorus Acids
Source: MDPI journal article supplement (doi:10.3390/molecules28166090), 2023-08-16
Supplement: s1 [file s1]

## Supplementary Material-

### “Enhanced LC–ESI–MS/MS Sensitivity by Cationic Derivatization of Organophosphorus Acids”

**Figure S1.** Linear calibration curves of CAX-EMPA, CAX-PMPA, CAX-DETP and CAX-DBP in acetonitrile extracts of concrete (a) and plant (b).

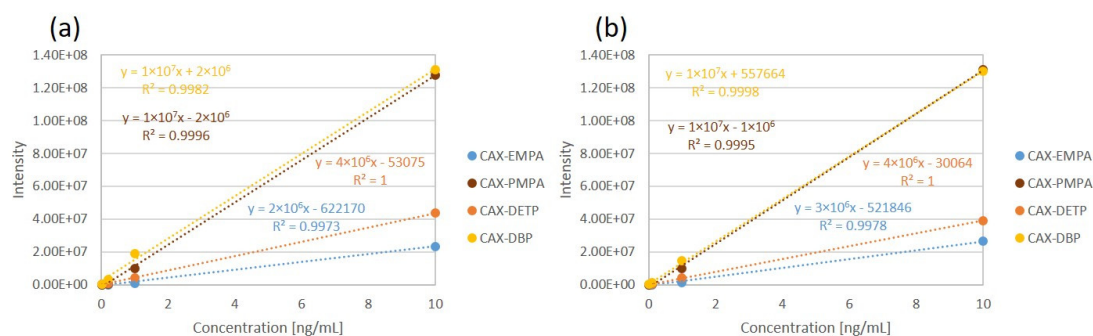

**Figure S2.** Chromatograms of 200 pg/mL CAX-EMPA (a), CAX-PMPA (b) and CAX-DETP (c) in concrete extract (green) over blank concrete extract (red).

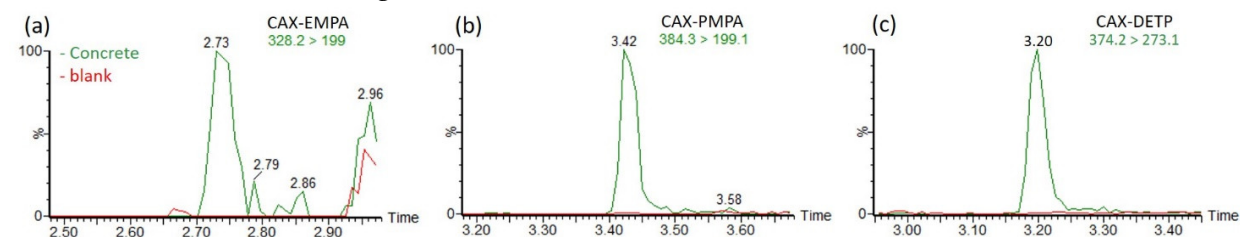

**Table S1.** Limits of identification (LOIs) of OP-acids before and after derivatization in real-world matrices.

| Compound | LOI in Plant ext. (ng/mL) |            | LOI in Concrete ext. (ng/mL) |            | LOI in Hair ext. (ng/mL) |            |
|----------|---------------------------|------------|------------------------------|------------|--------------------------|------------|
|          | Before der.               | After der. | Before der.                  | After der. | Before der.              | After der. |
| EMPA     | 10                        | 0.02       | 10                           | 0.2        | 10                       | 0.2        |
| PMPA     | 10                        | 0.1        | 1                            | 0.2        | 10                       | 0.2        |
| DEP      | 10                        | 0.02       | 10                           | 0.02       | 10                       | 0.02       |
| DBP      | 10                        | 0.02       | 10                           | 0.02       | 10                       | 0.02       |
| DETP     | 10                        | 0.1        | 10                           | 0.02       | 10                       | 0.02       |
